# Supplementary material for: Spark Discharge Synthesis and Characterization of Ge/Sn Janus Nanoparticles
Source: Nanomaterials (Basel). 2023 May 22;13(10):1701. doi: 10.3390/nano13101701 (PMC10223582; doi:10.3390/nano13101701)
Supplement: Supplementary file 1 [file nanomaterials-13-01701-s001.zip › nanomaterials-2367770-supplementary.pdf]

# Spark Discharge Synthesis and Characterization of Ge/Sn Janus Nanoparticles

Anna A. Lizunova <sup>1,\*</sup>, Vladislav I. Borisov <sup>1</sup>, Dana Malo <sup>1,2</sup>, Andrey G. Musaev <sup>1</sup>, Ekaterina I. Kameneva <sup>1</sup>, Alexey A. Efimov <sup>1</sup>, Ivan A. Volkov <sup>1</sup>, Arseny I. Buchnev <sup>1</sup>, Ivan A. Shuklov <sup>1</sup> and Victor V. Ivanov <sup>1</sup>

<sup>1</sup> Moscow Institute of Physics and Technology, 141701 Dolgoprudny, Russia

<sup>2</sup> Damascus University, Biomedical Engineering Department, Faculty of Mechanical and Electrical Engineering, P.O.Box 30621, Damascus, Syria

\* Correspondence: lizunova.aa@mipt.ru

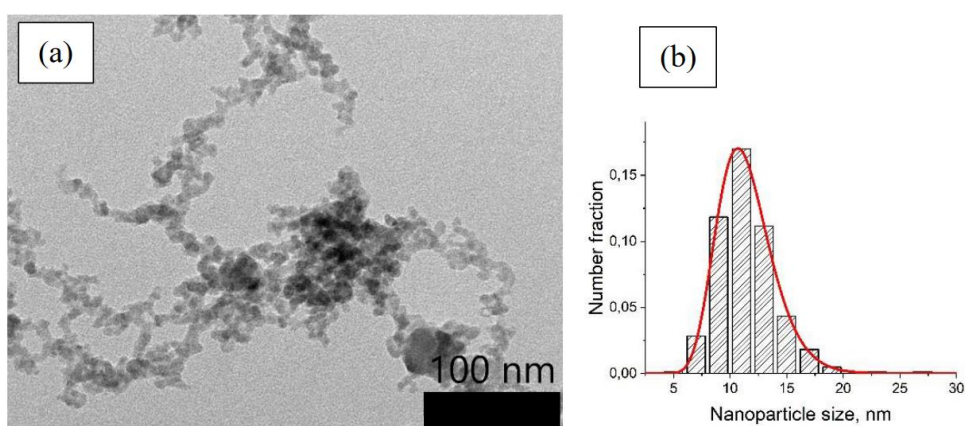

**Figure S1.** (a) TEM image of the Ge/Sn agglomerates prepared in spark discharge with additional thermal treatment at 325 °C and (b) the corresponding primary particle size distribution, approximated by a lognormal function.

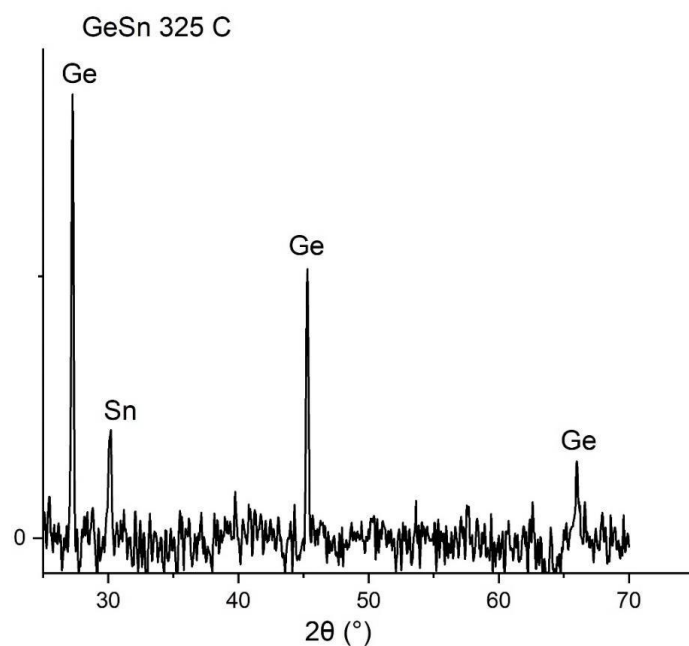

**Figure S2.** The XRD pattern of the Ge/Sn agglomerated nanoparticles, prepared in spark discharge with additional heat treatment in a tube furnace at 325 °C.

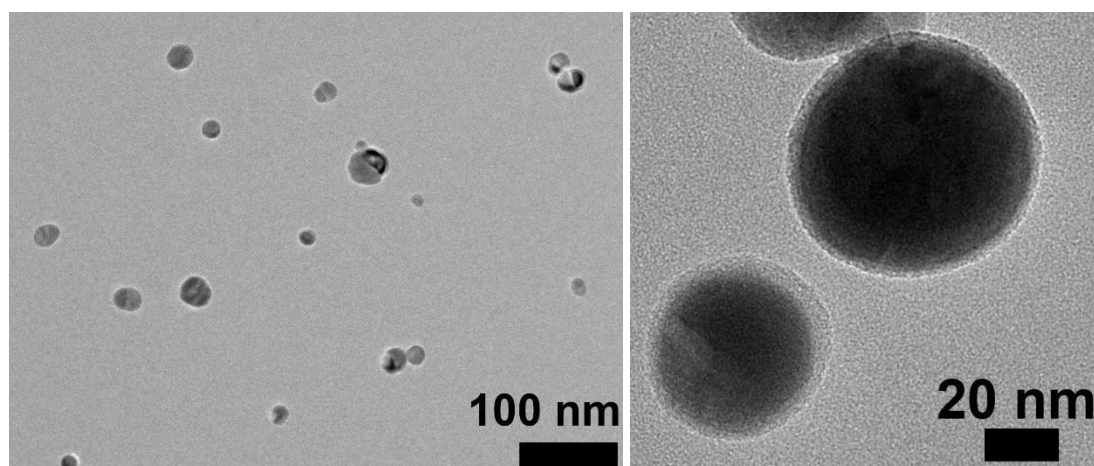

**Figure S3.** TEM images of the individual Ge/Sn nanoparticles with crystal core covering by amorphous shell, prepared in spark discharge with additional heat treatment in a tube furnace at 750 °C.
